# Supplementary material for: One-step fabrication of RGO/HNBR composites via selective hydrogenation of NBR with graphene-based catalyst
Source: Royal Society of Chemistry journal article supplement (doi:10.1039/c5ra05271h), 2015-01-01
Supplement: c5ra05271h1.pdf [file c5ra05271h1.pdf]

Online supporting information

## **One-Step Fabrication of RGO/HNBR Composites via Selective Hydrogenation of NBR with Graphene-Based Catalyst**

Peng Cao<sup>a</sup>, Changyue Huang<sup>a</sup>, Liqun Zhang<sup>a,b</sup>, Dongmei Yue<sup>a,b\*</sup>

<sup>a</sup>State Key Laboratory of Organic-Inorganic Composites, Beijing University of  
Chemical Technology, Beijing 100029, China

<sup>b</sup>Key Laboratory of Beijing City on Preparation and Processing of Novel Polymer  
Materials, Beijing 100029, China

\*Corresponding author: Dongmei Yue

E-mail: yuedm@mail.buct.edu.cn

Tel: +86-010-64436201; Fax: +86-010-64436201

### **Experimental**

#### **Materials**

High-purity graphite powder ( $\geq 99.99\%$ ) was purchased from Aldrich Chemistry.  $\text{RhCl}_3 \cdot 3\text{H}_2\text{O}$  was purchased from Shanghai Jiulin Chemical Co., Ltd. Nitrile rubber (Nancar1052M30) was obtained from Taiwan Nantex Chemical Industry Company, Limited.  $\text{H}_2\text{SO}_4$  ( $\geq 98 \text{ wt}\%$ ),  $\text{NaNO}_3$  ( $\geq 99.9 \text{ wt}\%$ ) and  $\text{KMnO}_4$  ( $\geq 99.0 \text{ wt}\%$ ) were obtained from Tianjin Guangfu Research Institute of Fine Chemicals. Chlorobenzene (AR), anhydrous ethanol (AR), acetone (AR), hydrazine (80 wt%) and ammonia (25 wt%) were all obtained from Beijing Chemical Factory. Triphenylphosphine and deuterated chloroform were obtained from National Chemical Reagent Co., Ltd. Nitrogen (research grade;  $\text{N}_2 > 99.99\%$ ) and hydrogen (research grade;  $\text{H}_2 > 99.99\%$ ) were donated by Beijing Beifen Gas Industries Co., Ltd.

#### **Synthesis of Rh/RGO nanoparticles**

In the experiments, GO was prepared by the oxidation of high purity graphite powder ( $\geq 99.99\%$ , Aldrich Chemistry) with  $\text{H}_2\text{SO}_4/\text{KMnO}_4$  according to the method of Hummers and Offeman.<sup>1</sup> After repeated washing of the resulting yellowish-brown cake with plenties of deionized water, the sediment was dried at 70 °C in an vacuum

oven overnight. Then, the GO dissolved in deionized water to form a solution of GO of 6 g/L for next step.

For the preparation of Rh/RGO, 25 mL of GO solution and 4 mL of  $\text{RhCl}_3 \cdot 3\text{H}_2\text{O}$  solution (2 g/L) were sonicated in 450 mL deionized water until a homogeneous yellow dispersion was obtained, and 2 mL ammonia (25 wt%) was added; after 15 min ultrasonication, reducing agent (hydrazine or sodium borohydride) was added to the mixture. The ultrasonication was continued for 30 min, and then the three-neck flask was heated at 100 °C with mechanical stirring. After 6~8 h of reduction, the black product was centrifuged at 6000 rpm for 20 min for 3 times, washed with deionized water until the pH reached 7 and dried overnight under vacuum.

### **General procedure for preparation of RGO/HNBR composites**

The hydrogenation reaction was carried out in a 1000-mL high pressure reactor. The NBR chlorobenzene solution and catalyst of Rh/RGO were placed into the reactor. Before being heated to the reaction temperature, the reactor was degassed with  $\text{N}_2$  for 3 times to remove air. Then the reactor was heated to the desired temperature, and the reaction was initiated by flushing  $\text{H}_2$  to 430 psi and adjusted the agitation rate to 480 rpm. The hydrogen pressure and reaction temperature were kept constant throughout the reaction. The conversion of the double bonds, also called the degree of hydrogenation (HD), was calculated as:

$$\text{HD} = (1 - [\text{C}=\text{C}]_t / [\text{C}=\text{C}]_0) \times 100\% \quad (1)$$

where  $[\text{C}=\text{C}]_t$  is the concentration of C=C bonds at reaction time t and  $[\text{C}=\text{C}]_0$  is the initial double bond concentration. The hydrogenated NBR sample was analyzed by  $^1\text{H}$ NMR.<sup>2</sup> After hydrogenation, the RGO remained in the substance of HNBR to form RGO/HNBR composite.

### **Characterization of the catalysts**

The physical and chemical properties of the prepared catalysts were measured by several methods. FTIR spectra were obtained by a Bruker Tensor 27 spectrophotometer in the wave-number range of 400-4000  $\text{cm}^{-1}$ . The crystal phases of the samples were determined by X-ray diffraction (XRD, Bruker D8 Advance) at a

scanning rate of 0.02 °/s in the  $2\theta$  range of 5° to 90°. The morphology of the GO and Rh/RGO sheets were examined by an atomic force microscope (BRUKER MultiMode 8) using tapping mode. The Raman spectra were measured using an excitation wavelength of 514 nm provided by a Renishaw invia argon ion laser. Transmission electron microscopy (TEM) images were obtained using a JEOL JEM-2100 electron microscope operated at 200 kV. Samples for TEM were prepared by placing a droplet of a colloid suspension in ethanol on a carbon-coated, 300-mesh copper grid and allowed to evaporate in air at room temperature. X-ray photoelectron spectroscopy (XPS) was performed on a Thermo Fisher Scientific ESCALAB 250 system with monochromatized Al K $\alpha$  radiation at 15 kV.

## Supplementary Figures and Tables

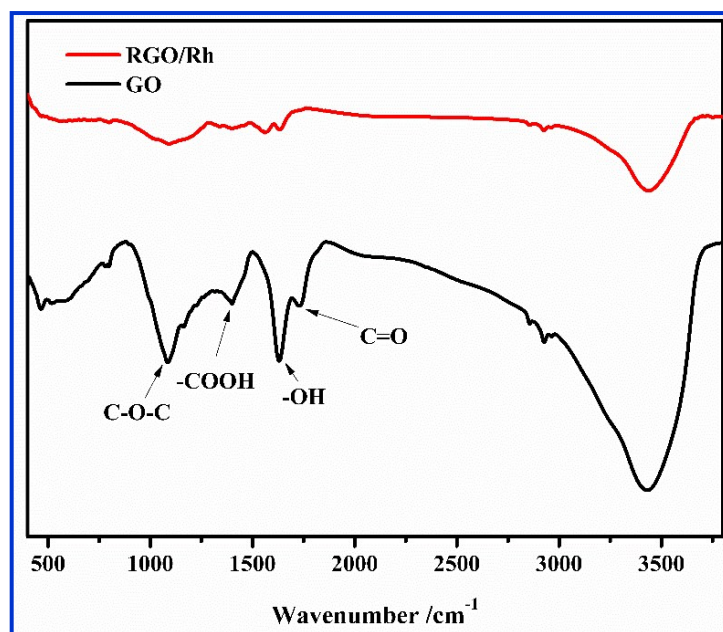

Figure S1 The FTIR spectra of GO and RGO/Rh

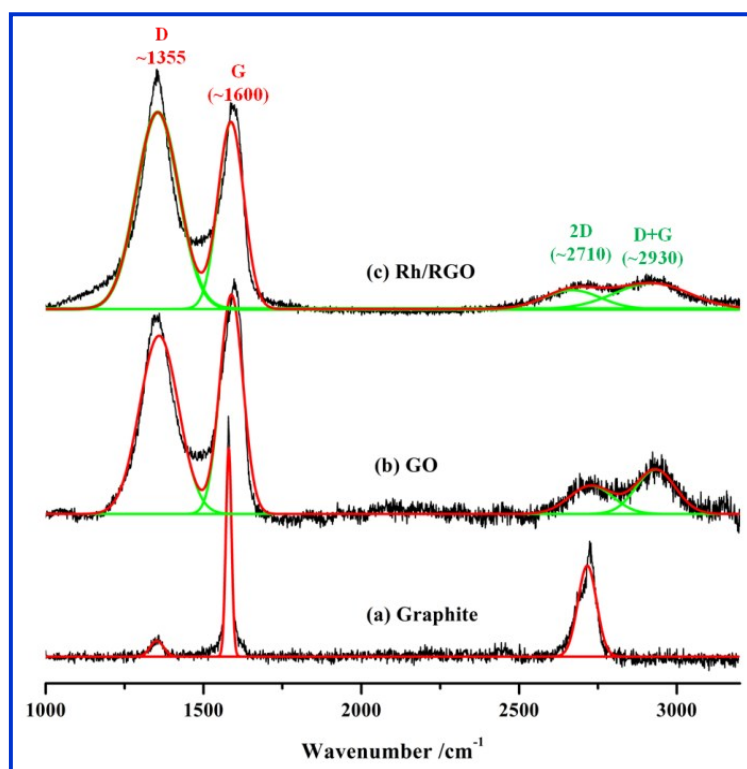

Figure S2 Raman spectra of (a) graphite, (b) GO, and (c) Rh/RGO.

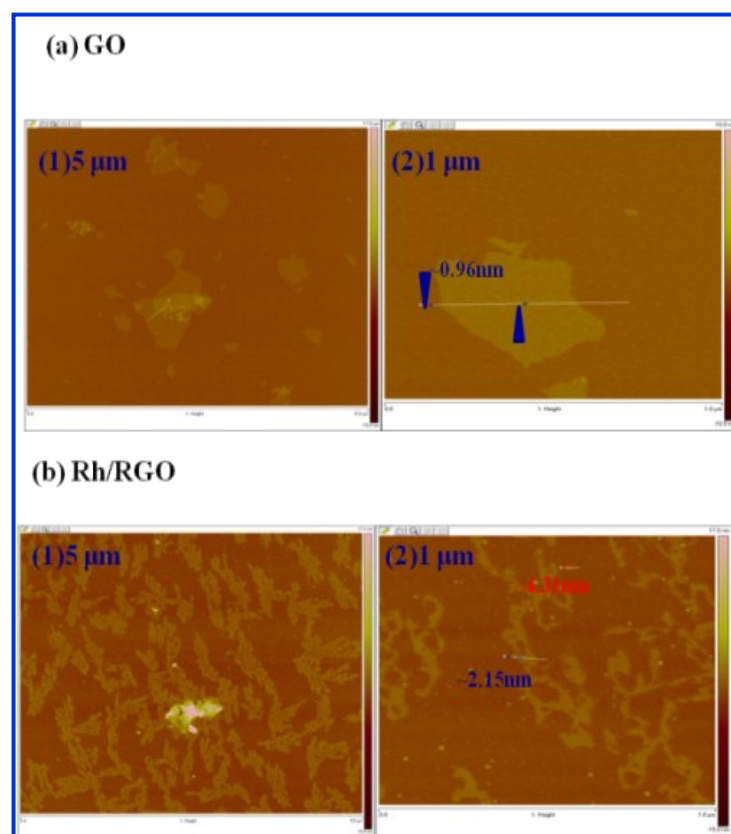

Figure S3 AFM images and section analyses of (a) GO and (b) Rh/RGO.

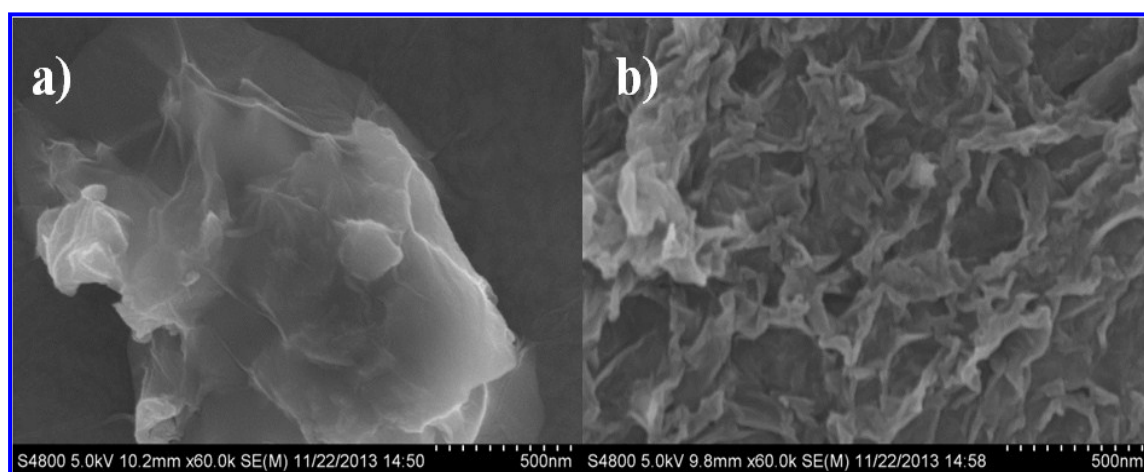

Figure S4 SEM image of (a) GO and (b) Rh/RGO.

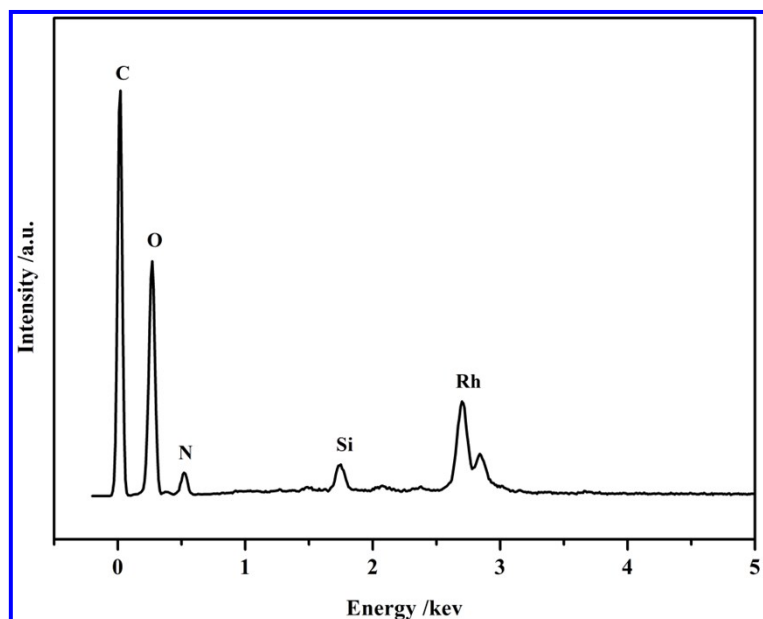

Figure S5 EDS analysis of Rh/RGO.

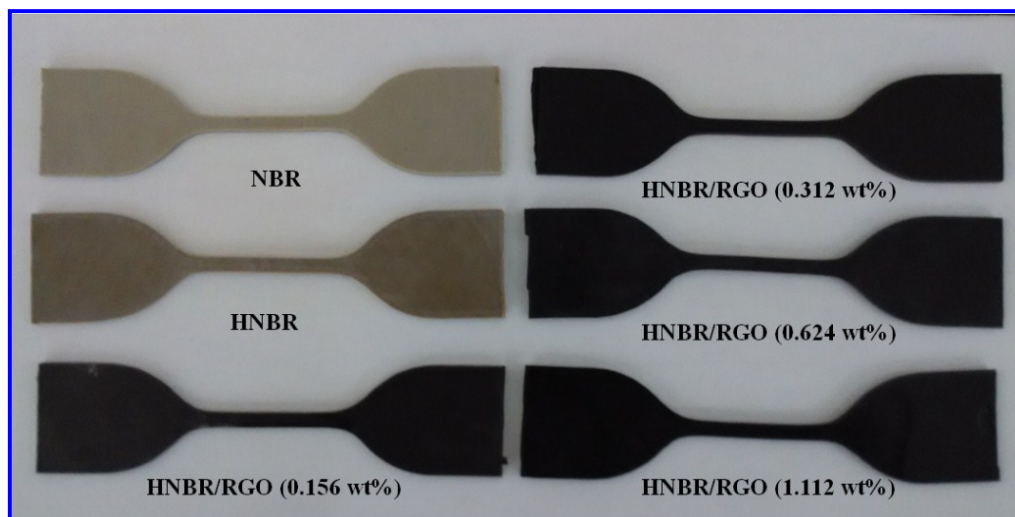

Figure S6 The image of tested samples.

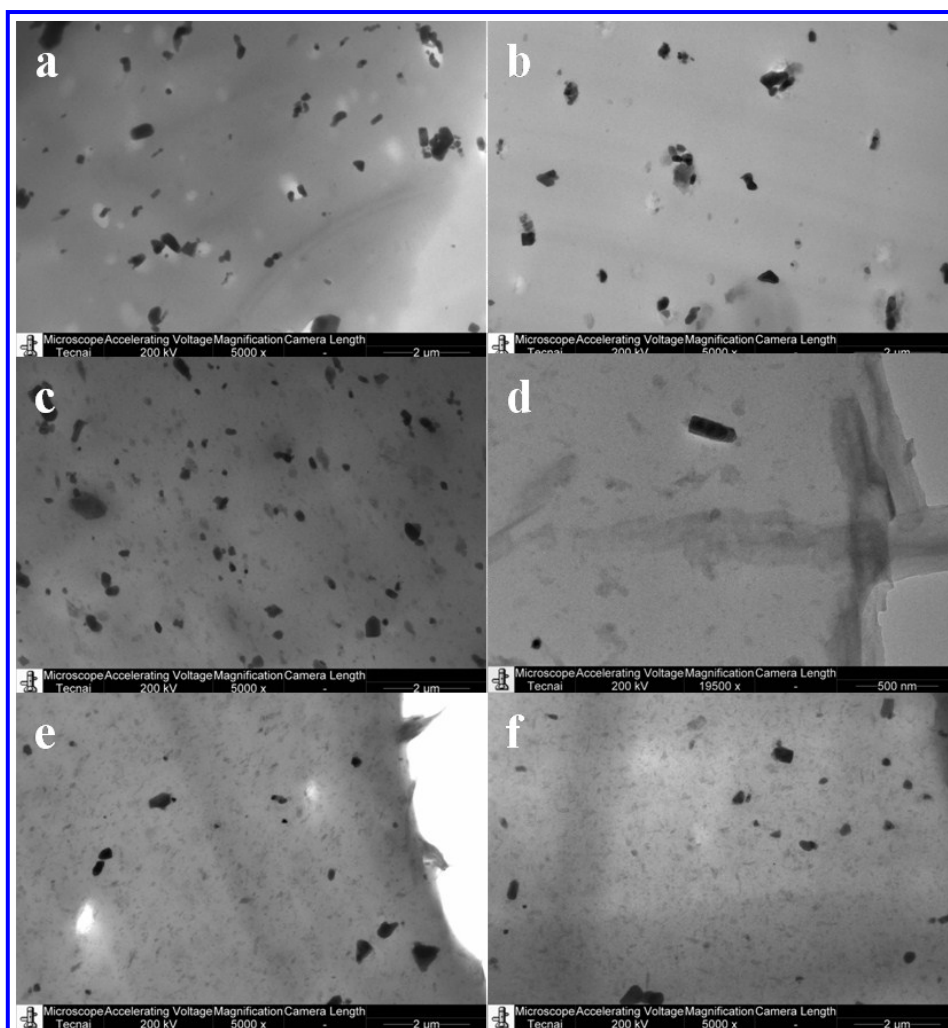

Figure S7 The TEM of (a) NBR, (b) HNBR and RGO/HNBR with different content of RGO: (c) 0.156 wt%, (d) 0.312 wt%, (e) 0.624 wt% and (f) 1.112 wt%

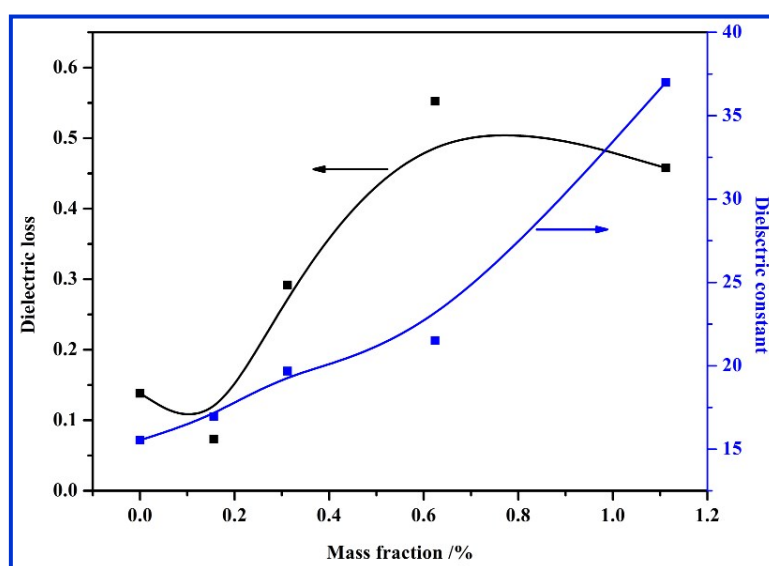

Figure S8 Dielectric constant and dielectric loss of RGO/HNBR composites at  $10^3$  Hz

Table S1. Raman spectra data of GO and Rh/RGO catalyst

| Sample | Band position (cm <sup>-1</sup> ) |      |      |      | $I_D/I_G^a$ | $I_{2D}/I_{D+G}^a$ |
|--------|-----------------------------------|------|------|------|-------------|--------------------|
|        | D                                 | G    | 2D   | D+G  |             |                    |
| GO     | 1355                              | 1601 | 2714 | 2935 | 1.367       | 0.705              |
| Rh/RGO | 1356                              | 1599 | 2706 | 2934 | 1.747       | 1.191              |

<sup>a</sup>Determined from the relative peak areas in Raman spectra.

Table S2. XPS data of graphite, GO and Rh/RGO catalyst

| Sample name                         | Relative atomic percentage (%) |       |      |       | Heterocarbon component (%) | Relative atomic percentage (%) |                  |
|-------------------------------------|--------------------------------|-------|------|-------|----------------------------|--------------------------------|------------------|
|                                     | C=C                            | C-OH  | C=O  | O-C=O |                            | Metallic Rh                    | Rh <sup>3+</sup> |
| Graphite                            | 91.09                          | 7.21  | 0.42 | 1.28  | 8.91                       | -                              | -                |
| GO                                  | 50.35                          | 44.01 | 5.64 | 0     | 49.65                      | -                              | -                |
| Rh/RGO <sub>-NaBH<sub>4</sub></sub> | 81.03                          | 15.84 | 0    | 3.13  | 18.97                      | 78.98                          | 21.02            |
| Rh/RGO <sub>-HH</sub>               | 71.86                          | 15.98 | 8.85 | 3.31  | 28.14                      | 1.15                           | 98.75            |

<sup>a</sup>calculated by the peak area of Rh 3d XPS analysis of Rh/RGO.

Table S3. The vulcanization recipe

|                  | PHR |
|------------------|-----|
| Rubber           | 100 |
| Zinc oxide       | 5   |
| Stearic acid     | 1   |
| Sulfur           | 0.5 |
| Accelerator M    | 0.5 |
| Accelerator TMTD | 2   |
| Antiager D       | 1   |
| Antiager 4010    | 1   |

PHR stands for one gram per a hundred gram of rubber.

Table S4. Mechanical properties of graphene/graphite-based rubber nanocomposites

| Matrix | Filler   | Synthetic routes | Filler loading     | Mechanical properties |              | Reference         |
|--------|----------|------------------|--------------------|-----------------------|--------------|-------------------|
|        |          |                  |                    | Tensile strength      | Elongation   |                   |
|        |          |                  |                    | (MPa)                 | at break (%) |                   |
| HXNBR  | GO       | Solution         | 0 <sup>a</sup>     | 14.8±0.8              | 534±13       | Ref. <sup>3</sup> |
|        |          |                  | 0.22 <sup>a</sup>  | 21.7±1.8              | 485±10       |                   |
|        |          |                  | 0.44 <sup>a</sup>  | 22.4±1.3              | 419±18       |                   |
|        |          |                  | 1.3 <sup>a</sup>   | 10.3±0.5              | 248±8        |                   |
| NR     | rGO      | Solution         | 0 <sup>a</sup>     | 17.1                  | 579          | Ref. <sup>4</sup> |
|        |          |                  | 2 <sup>a</sup>     | 25.2                  | 564          |                   |
| NR     | rGO      | Solution         | 0 <sup>a</sup>     | 5.15                  | 844          | Ref. <sup>5</sup> |
|        |          |                  | 5 <sup>a</sup>     | 10.18                 | 319          |                   |
| NBL    | GE       | Latex            | 0 <sup>a</sup>     | 17.0                  | 1111         | Ref. <sup>6</sup> |
|        |          |                  | 1.78 <sup>b</sup>  | 23.3                  | 783          |                   |
| NBR    | Graphite | -                | 0 <sup>a</sup>     | 3.2                   | 500          | Ref. <sup>7</sup> |
|        |          | Dry mixing       | 5 <sup>a</sup>     | 6.6                   | 630          |                   |
|        |          | Solution         | 5 <sup>a</sup>     | 5.0                   | 600          |                   |
|        |          | Latex            | 5 <sup>a</sup>     | 10.5                  | 180          |                   |
| NR     | Modified | Solution         | 0 <sup>a</sup>     | 7.35                  | -            | Ref. <sup>8</sup> |
|        | GO       |                  | 0.3 <sup>a</sup>   | 14.7                  | -            |                   |
| HNBR   | rGO      | Solution         | 0 <sup>a</sup>     | 18.57                 | 610.90       | Our work          |
|        |          |                  | 0.156 <sup>a</sup> | 20.21                 | 628.56       |                   |
|        |          |                  | 0.312 <sup>a</sup> | 22.14                 | 685.34       |                   |
|        |          |                  | 0.624 <sup>a</sup> | 23.12                 | 720.71       |                   |
|        |          |                  | 1.112 <sup>a</sup> | 26.80                 | 850.62       |                   |

Notes: a-wt%, b-vol%.

## Reference:

1. (a) Hummers, W. S.; Offeman, R. E., Preparation of Graphitic Oxide. *Journal of the American Chemical Society* **1958**, 80 (6), 1339-1339; (b) Moussa, S.; Siamaki, A. R.; Gupton, B. F.; El-Shall, M. S., Pd-Partially Reduced Graphene Oxide Catalysts (Pd/PRGO): Laser Synthesis of Pd Nanoparticles Supported on PRGO Nanosheets for Carbon–Carbon Cross Coupling Reactions. *ACS Catalysis* **2012**, 2 (1), 145-154.
2. Marshall, A. J.; Jobe, I. R.; Dee, T.; Taylor, C., Determination of the Degree of Hydrogenation in Hydrogenated Nitrile-Butadiene Rubber (HNBR). *Rubber Chemistry and Technology* **1990**, 63 (2), 244-255.
3. Bai, X.; Wan, C.; Zhang, Y.; Zhai, Y., Reinforcement of hydrogenated carboxylated nitrile–butadiene rubber with exfoliated graphene oxide. *Carbon* **2011**, 49 (5), 1608-1613.
4. Zhan, Y.; Wu, J.; Xia, H.; Yan, N.; Fei, G.; Yuan, G., Dispersion and Exfoliation of Graphene in Rubber by an Ultrasonically-Assisted Latex Mixing and In situ Reduction Process. *Macromolecular Materials and Engineering* **2011**, 296 (7), 590-602.
5. Potts, J. R.; Shankar, O.; Murali, S.; Du, L.; Ruoff, R. S., Latex and two-roll mill processing of thermally-exfoliated graphite oxide/natural rubber nanocomposites. *Composites Science and Technology* **2013**, 74 (0), 166-172.
6. Zhan, Y.; Lavorgna, M.; Buonocore, G.; Xia, H., Enhancing electrical conductivity of rubber composites by constructing interconnected network of self-assembled graphene with latex mixing. *Journal of Materials Chemistry* **2012**, 22 (21), 10464-10468.
7. YANG, J.; TIAN, M.; JIA, Q.-x.; SHI, J.-h.; ZHANG, L.-q., Study on Preparation, Structure and Properties of NBR/Graphite Nanocomposites. *Special Purpose Rubber Products* **2007**, 1, 000.
8. Wu, J.; Huang, G.; Li, H.; Wu, S.; Liu, Y.; Zheng, J., Enhanced mechanical and gas barrier properties of rubber nanocomposites with surface functionalized graphene oxide at low content. *Polymer* **2013**, 54 (7), 1930-1937.
